# Supplementary material for: Bio-hybrid micro-swimmers propelled by flagella isolated from C. reinhardtii
Source: Royal Society of Chemistry journal article supplement (doi:10.1039/d2sm00574c), 2022-01-01
Supplement: d2sm00574c2.pdf [file d2sm00574c2.pdf]

Cite this: DOI: 00.0000/xxxxxxxxxx

### Supplementary Material for: Bio-hybrid micro-swimmers propelled by flagella isolated from *C. reinhardtii*<sup>†</sup>

Raheel Ahmad<sup>a</sup>, Albert J Bae<sup>a,b</sup>, Yu-Jung Su<sup>a</sup>, Samira Goli Pozveh<sup>a</sup>, Eberhard Bodenschatz<sup>a,c,d</sup>, Alain Pumir<sup>a,e</sup>, and Azam Gholami<sup>a,\*</sup>

Received Date

Accepted Date

DOI: 00.0000/xxxxxxxxxx

<sup>a</sup>Max Planck Institute for Dynamics and Self-Organization, Am Fassberg 17, D-37077 Göttingen, Germany.

<sup>b</sup>Lewis & Clark College, Portland, Oregon, USA.

<sup>c</sup>Institute for Dynamics of Complex Systems, University of Göttingen, Göttingen 37077, Germany.

<sup>d</sup>Laboratory of Atomic and Solid-State Physics and Sibley School of Mechanical and Aerospace Engineering, Cornell University, Ithaca, New York 14853, USA.

<sup>e</sup>Laboratoire de Physique, Ecole Normale Supérieure de Lyon, Université Lyon 1 and CNRS, F-69007 Lyon, France.

\*E-mail: azam.gholami@ds.mpg.de

## Supplementary figures

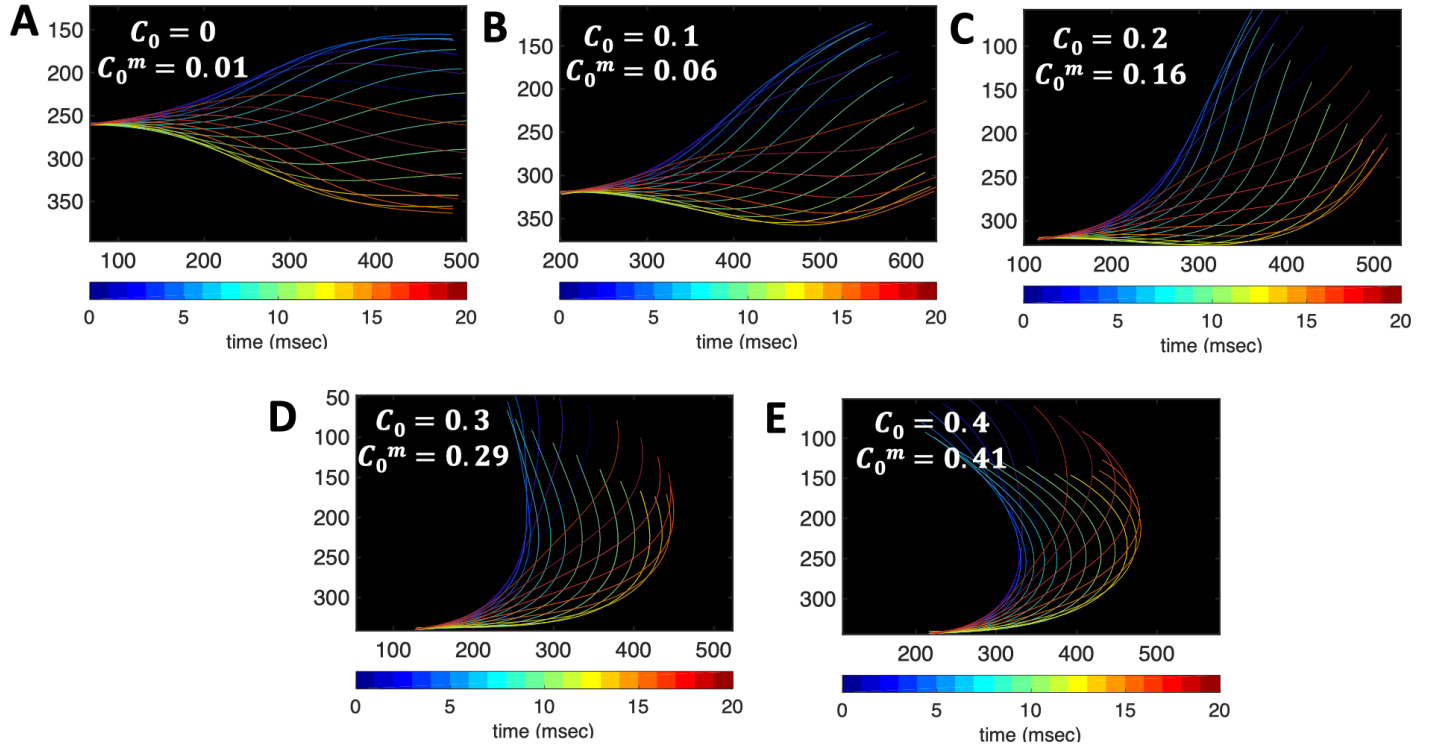

Fig. S1 To measure the systematic error of our tracking GVF algorithm, we generated artificial data with known values of dimensionless mean curvature  $C_0 = \kappa_0 L / (2\pi)$ , and tracked the filaments using GVF. The measured values of mean curvatures of tracked filaments is given by  $C_0^m$ . As it is shown in the panels A-E, the measured values deviate from the real values at small  $C_0$ , but approaches the real values at higher  $C_0$ . In other words, our algorithm has a smaller systematic error (less than 4%) for curved filaments with  $C_0 > 0.3$ .

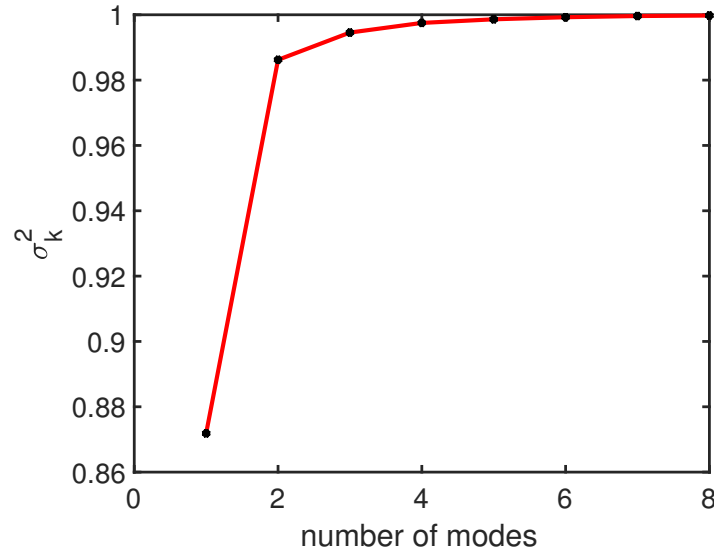

Fig. S2 Fraction of the total variance  $\sigma_k^2$ , as defined in Sec. 2.3, plotted versus the number of PCA modes  $n$  for the axoneme shown in Fig. 3A.

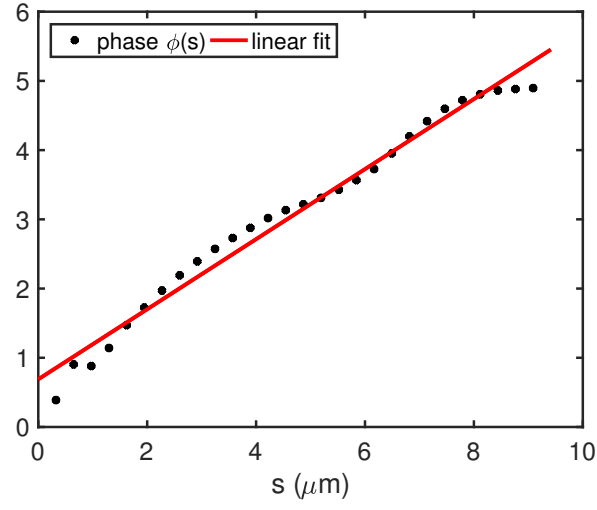

Fig. S3 The phase  $\phi(s)$  of traveling curvature waves of the axoneme presented in Fig. 3A, obtained by performing Fourier transform in time at each position  $s$  along the axonemal length. The wavelength is then calculated as  $\lambda = 2\pi L/(\phi(L) - \phi(0)) = 13.19 \mu\text{m}$ . The red line represents a linear fit, which we extrapolate to obtain  $\phi(0)$ .

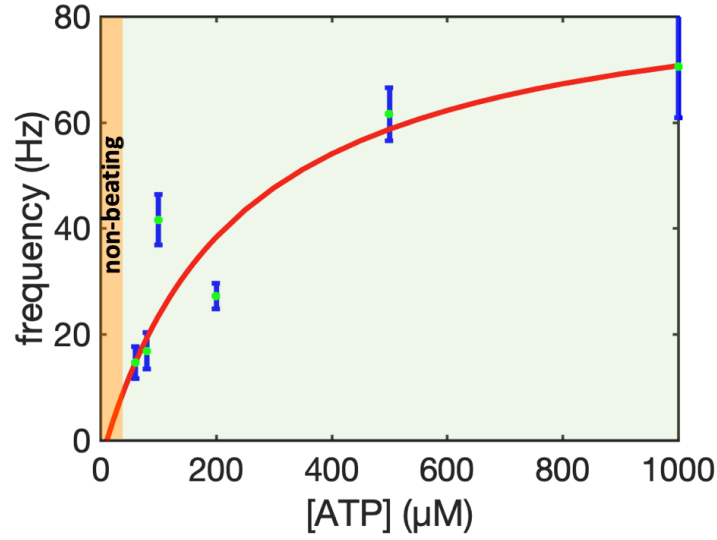

Fig. S4 The frequency of reactivated axonemes depends on the  $[\text{ATP}]$  and follows a Michaelis-Menten type kinetics with a linear trend at small  $[\text{ATP}]$  and saturation at higher  $[\text{ATP}]$ . A minimum critical concentration of  $[\text{ATP}]_{\text{critical}} = 60 \mu\text{M}$  is needed to reactivate the axonemes. In all the experiments  $[\text{Ca}^{2+}] = 0 \text{ mM}$ .

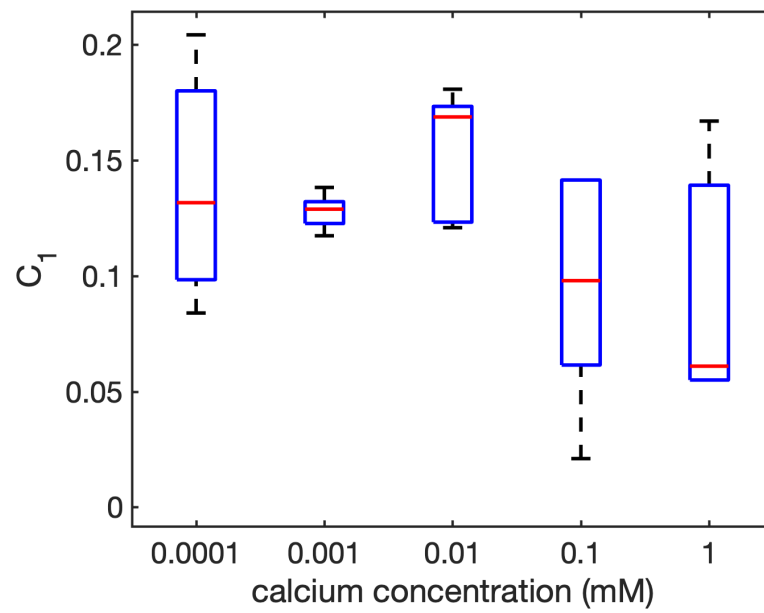

Fig. S5 The amplitude of traveling wave component  $C_1$  is less sensitive to the calcium concentration and shows a reduction at high  $[Ca^{2+}]$  around 1 mM.
